# Supplementary material
Source: ML conference proceedings conference paper supplement (https://proceedings.neurips.cc/paper_files/paper/2022/hash/49d608425f1bee2864e034a9e9e1ec9e-Abstract.html)
Supplement: Supplementary file 1 [file 49d608425f1bee2864e034a9e9e1ec9e-Supplemental-Conference.zip]

Archive with 64 entries (61 files):
- SupplementaryInformation_rebuttal 2/
- __MACOSX/._SupplementaryInformation_rebuttal 2
- SupplementaryInformation_rebuttal 2/.DS_Store
- __MACOSX/SupplementaryInformation_rebuttal 2/._.DS_Store
- SupplementaryInformation_rebuttal 2/videos/
- __MACOSX/SupplementaryInformation_rebuttal 2/._videos
- SupplementaryInformation_rebuttal 2/Supplementary_rebuttal.pdf
- __MACOSX/SupplementaryInformation_rebuttal 2/._Supplementary_rebuttal.pdf
- SupplementaryInformation_rebuttal 2/rebuttal_figures/
- __MACOSX/SupplementaryInformation_rebuttal 2/._rebuttal_figures
- SupplementaryInformation_rebuttal 2/videos/leaf_truthvspred.gif
- __MACOSX/SupplementaryInformation_rebuttal 2/videos/._leaf_truthvspred.gif
- SupplementaryInformation_rebuttal 2/videos/.DS_Store
- __MACOSX/SupplementaryInformation_rebuttal 2/videos/._.DS_Store
- SupplementaryInformation_rebuttal 2/videos/water_truthvspred.mp4
- __MACOSX/SupplementaryInformation_rebuttal 2/videos/._water_truthvspred.mp4
- SupplementaryInformation_rebuttal 2/videos/leaf_truthvspred.mp4
- __MACOSX/SupplementaryInformation_rebuttal 2/videos/._leaf_truthvspred.mp4
- SupplementaryInformation_rebuttal 2/videos/waterflow100frames.mp4
- __MACOSX/SupplementaryInformation_rebuttal 2/videos/._waterflow100frames.mp4
- SupplementaryInformation_rebuttal 2/videos/feature_output.mp4
- __MACOSX/SupplementaryInformation_rebuttal 2/videos/._feature_output.mp4
- SupplementaryInformation_rebuttal 2/videos/fish_truthvspred.gif
- __MACOSX/SupplementaryInformation_rebuttal 2/videos/._fish_truthvspred.gif
- SupplementaryInformation_rebuttal 2/videos/fishmovie.mp4
- __MACOSX/SupplementaryInformation_rebuttal 2/videos/._fishmovie.mp4
- SupplementaryInformation_rebuttal 2/videos/feature_objectmotionbackground.mp4
- __MACOSX/SupplementaryInformation_rebuttal 2/videos/._feature_objectmotionbackground.mp4
- SupplementaryInformation_rebuttal 2/videos/leafmovie.mp4
- __MACOSX/SupplementaryInformation_rebuttal 2/videos/._leafmovie.mp4
- SupplementaryInformation_rebuttal 2/videos/watermovie.mp4
- __MACOSX/SupplementaryInformation_rebuttal 2/videos/._watermovie.mp4
- SupplementaryInformation_rebuttal 2/videos/leafflow100frames.mp4
- __MACOSX/SupplementaryInformation_rebuttal 2/videos/._leafflow100frames.mp4
- SupplementaryInformation_rebuttal 2/videos/fish_truthvspred.mp4
- __MACOSX/SupplementaryInformation_rebuttal 2/videos/._fish_truthvspred.mp4
- SupplementaryInformation_rebuttal 2/videos/fishflow100frames.mp4
- __MACOSX/SupplementaryInformation_rebuttal 2/videos/._fishflow100frames.mp4
- SupplementaryInformation_rebuttal 2/rebuttal_figures/feature_output_tmpact4.gif
- __MACOSX/SupplementaryInformation_rebuttal 2/rebuttal_figures/._feature_output_tmpact4.gif
- SupplementaryInformation_rebuttal 2/rebuttal_figures/.DS_Store
- __MACOSX/SupplementaryInformation_rebuttal 2/rebuttal_figures/._.DS_Store
- SupplementaryInformation_rebuttal 2/rebuttal_figures/water_latent.gif
- __MACOSX/SupplementaryInformation_rebuttal 2/rebuttal_figures/._water_latent.gif
- SupplementaryInformation_rebuttal 2/rebuttal_figures/distance_fishandleaf.png
- __MACOSX/SupplementaryInformation_rebuttal 2/rebuttal_figures/._distance_fishandleaf.png
- SupplementaryInformation_rebuttal 2/rebuttal_figures/distance_fishandwater.png
- __MACOSX/SupplementaryInformation_rebuttal 2/rebuttal_figures/._distance_fishandwater.png
- SupplementaryInformation_rebuttal 2/rebuttal_figures/tmp_5neuron_fish_long.png
- __MACOSX/SupplementaryInformation_rebuttal 2/rebuttal_figures/._tmp_5neuron_fish_long.png
- SupplementaryInformation_rebuttal 2/rebuttal_figures/fish_latent.gif
- __MACOSX/SupplementaryInformation_rebuttal 2/rebuttal_figures/._fish_latent.gif
- SupplementaryInformation_rebuttal 2/rebuttal_figures/tmp_meanPSTH_leaf.png
- __MACOSX/SupplementaryInformation_rebuttal 2/rebuttal_figures/._tmp_meanPSTH_leaf.png
- SupplementaryInformation_rebuttal 2/rebuttal_figures/tmp_meanPSTH_fish.png
- __MACOSX/SupplementaryInformation_rebuttal 2/rebuttal_figures/._tmp_meanPSTH_fish.png
- SupplementaryInformation_rebuttal 2/rebuttal_figures/tmp_meanPSTH_water.png
- __MACOSX/SupplementaryInformation_rebuttal 2/rebuttal_figures/._tmp_meanPSTH_water.png
- SupplementaryInformation_rebuttal 2/rebuttal_figures/leaf_latent.gif
- __MACOSX/SupplementaryInformation_rebuttal 2/rebuttal_figures/._leaf_latent.gif
- SupplementaryInformation_rebuttal 2/rebuttal_figures/feature_output_before.gif
- __MACOSX/SupplementaryInformation_rebuttal 2/rebuttal_figures/._feature_output_before.gif
- SupplementaryInformation_rebuttal 2/rebuttal_figures/feature_output_after.gif
- __MACOSX/SupplementaryInformation_rebuttal 2/rebuttal_figures/._feature_output_after.gif
