# Supplementary material
Source: ML conference proceedings conference paper supplement (https://proceedings.neurips.cc/paper_files/paper/2022/hash/49d608425f1bee2864e034a9e9e1ec9e-Abstract.html)

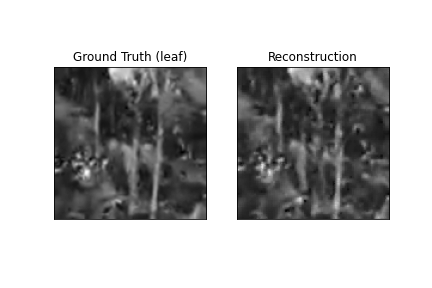

Supplement: Supplementary file 1 [file 49d608425f1bee2864e034a9e9e1ec9e-Supplemental-Conference.zip › SupplementaryInformation_rebuttal 2/videos/leaf_truthvspred.gif]
